# Supplementary material
Source: PubMed Central journal article supplement (PMC6638176)
Supplement: MPP-19-2333-s002.pdf [file MPP-19-2333-s002.pdf]

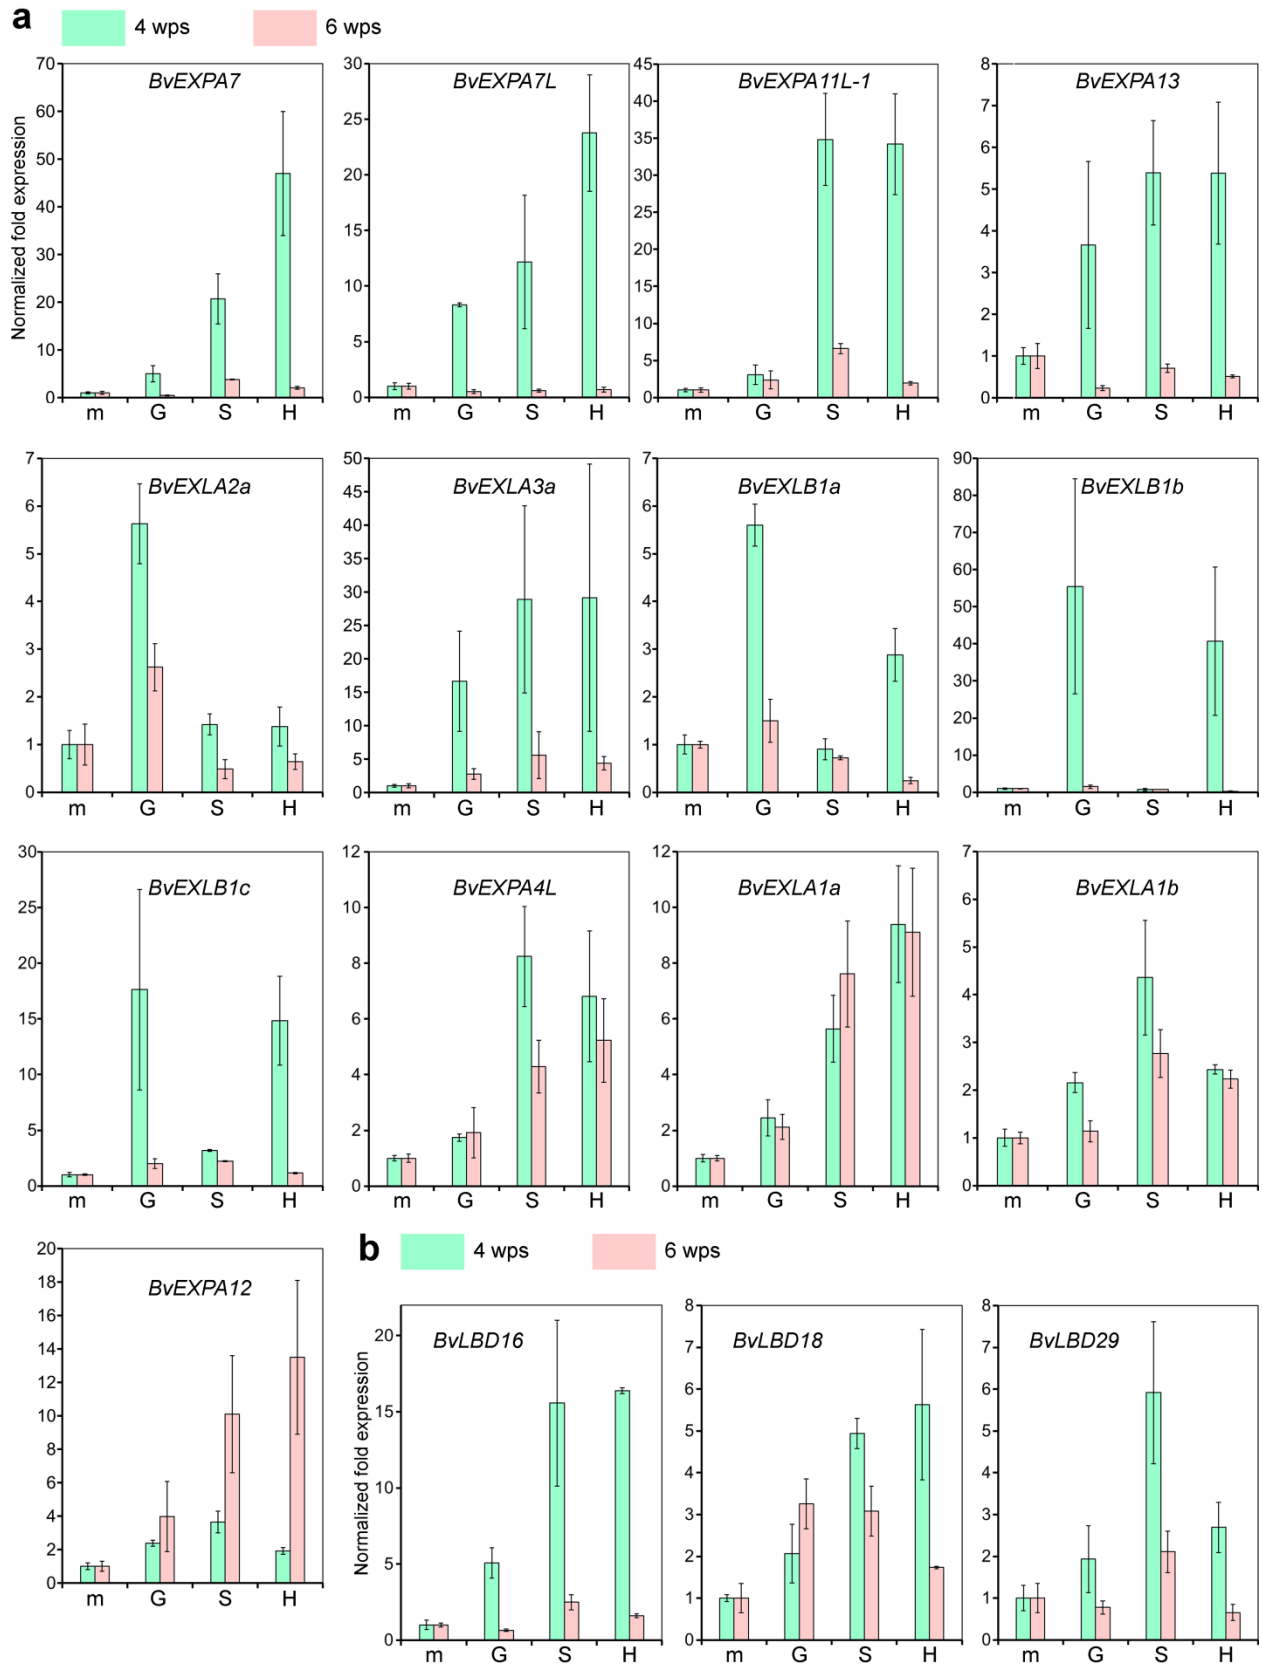

**Fig. S2.** Thirteen *EXPs* and three *LBDs* are up-regulated by natural soil-mediated infection with BNYVV.

(a) Expression of *EXPANSINs* in *B. vulgaris* plants grown in non-infested (mock, m) and BNYVV-infested soils from Germany (G), Sweden (S) and The Netherlands (Holland; H) at two time points 4 weeks post sowing (wps) and at 6 wps. (b) Expression of the genes encoding LBD16, LBD18, and LBD29 TFs in *B. vulgaris* plants grown in non-infested (mock) and rhizomania-infested soils from Germany, Sweden and The Netherlands (Holland). The expression was normalized with *BvICDH* gene encoding isocitrate dehydrogenase. Bars represent means  $\pm$  standard deviation (s.d.) ( $n \geq 4$ ).
