# Supplementary material
Source: PubMed Central journal article supplement (PMC6638176)
Supplement: MPP-19-2333-s003.pdf [file MPP-19-2333-s003.pdf]

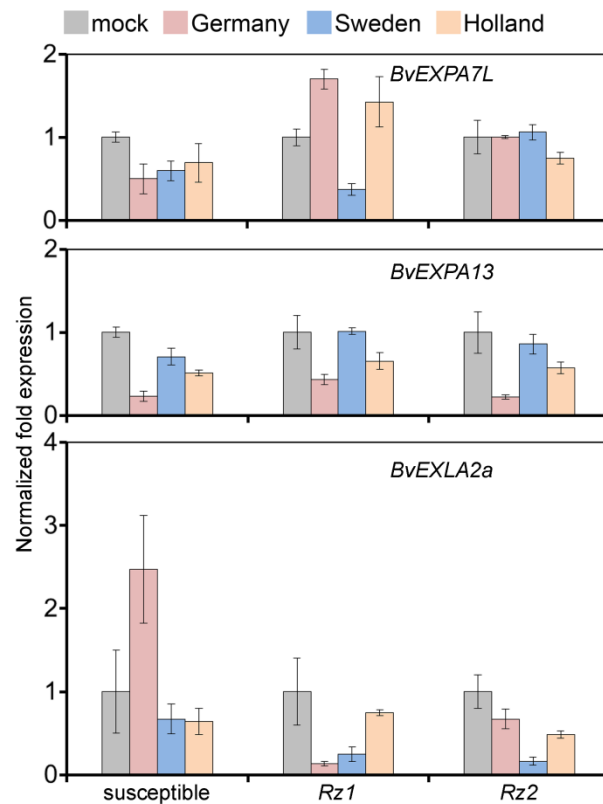

**Fig. S3** *BvEXPA7L*, *BvEXPA13* and *BvEXLA2a* are not transcriptionally activated by natural soil-mediated infection with BNYVV both in the susceptible and in the resistant varieties. Expression of *BvEXPA7L*, *BvEXPA13*, and *BvEXLA2a*, in sugar beet BNYVV-susceptible *versus* BNYVV-resistant varieties harboring *Rz1* or *Rz2* resistant genes, respectively. Plants were grown in non-infested (mock) and BNYVV-infested soils from Germany, Sweden and The Netherlands (Holland). Samples were collected for analysis 6 weeks post sowing (wps). The expression was normalized with *BvICDH*. Bars represent means  $\pm$  s.d.;  $n \geq 3$ .
