# Supplementary material
Source: PubMed Central journal article supplement (PMC6638176)
Supplement: MPP-19-2333-s004.pdf [file MPP-19-2333-s004.pdf]

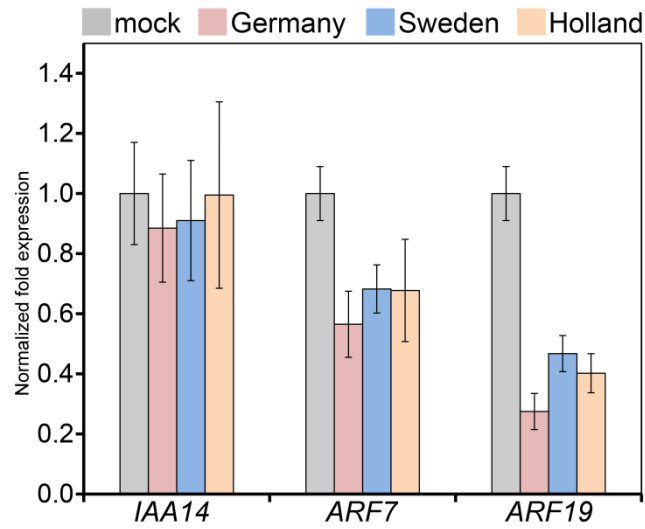

**Fig. S4** *BvIAA14*, *BvARF7* and *BvARF19* are not transcriptionally activated by natural soil-mediated infection with BNYVV. Expression of the genes encoding *BvIAA14* transcriptional repressor and, *BvARF7* and *BvARF19* transcriptional activators in roots of *B. vulgaris* plants grown in non-infested (mock) and rhizomania-infested soils from Germany, Sweden and The Netherlands (Holland). The expression was normalized with *BvICDH* gene encoding isocitrate dehydrogenase. Bars represent means  $\pm$  s.d. ( $n \geq 4$ ).
