# Supplementary material
Source: PubMed Central journal article supplement (PMC6638176)
Supplement: MPP-19-2333-s005.pdf [file MPP-19-2333-s005.pdf]

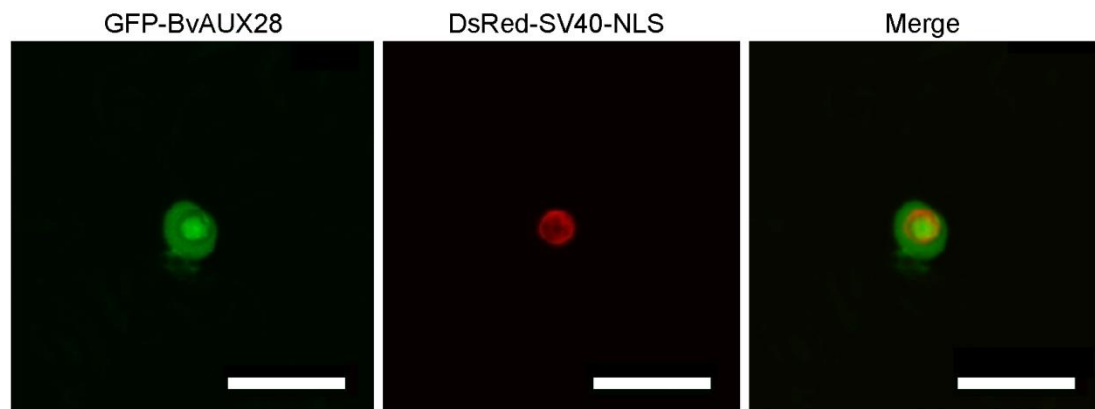

**Fig. S5** BvAUX28 localizes to the nucleus. GFP-tagged BvAUX28 (GFP-BvAUX28) was transiently co-expressed with DsRed-tagged the Nuclear Localization Signal (NLS) of Simian virus 40 (SV40) T-antigen in *N. benthamiana* using *A. tumefaciens*. Bars, 25µm.
