# Supplementary material
Source: PubMed Central journal article supplement (PMC6638176)
Supplement: MPP-19-2333-s007.pdf [file MPP-19-2333-s007.pdf]

**Table S2** Relative expression of *B. vulgaris* EXPANSINs in different organs measured by RT-qPCR. *BvEXPA23L-1*, *BvEXPA23L-2*, *BvEXPA25L*, *BvEXPA26* were not tested (NT) as their orthologues in other plant species are exclusively expressed in embryotic tissues and floral organs. Data are n=3. s.d., in parenthesis.

| Gene               | Root,<br>fold expression<br>(s.d.) | Hypocotyl,<br>fold expression<br>(s.d.) | Leaf,<br>fold expression<br>(s.d.) | Transcript<br>preferentially<br>accumulates in |
|--------------------|------------------------------------|-----------------------------------------|------------------------------------|------------------------------------------------|
| <i>BvEXPA2L</i>    | 1.025 (0.686)                      | 0.710 (0.537)                           | 0.007 (0.004)                      | root, hypocotyl                                |
| <i>BvEXPA4a</i>    | 0.975 (0.274)                      | 2.455 (0.558)                           | 0.678 (0.609)                      | root, hypocotyl, leaf                          |
| <i>BvEXPA4b</i>    | 0.760 (0.283)                      | 1.130 (0.339)                           | 0.813 (0.406)                      | root, hypocotyl, leaf                          |
| <i>BvEXPA4c</i>    | 1.020 (0.223)                      | 0.760 (0.339)                           | 0.950 (0.345)                      | root, hypocotyl, leaf                          |
| <i>BvEXPA4L</i>    | 0.997 (0.365)                      | 0.193 (0.076)                           | 0.033 (0.004)                      | root                                           |
| <i>BvEXPA7</i>     | 1.068 (0.413)                      | 0.307(0.051)                            | 0.089 (0.012)                      | root                                           |
| <i>BvEXPA7L</i>    | 0.988 (0.262)                      | 1.445 (0.638)                           | 0.110 (0.029)                      | root, hypocotyl                                |
| <i>BvEXPA10</i>    | 0.846 (0.217)                      | 2.555 (2.354)                           | 3.000 (1.260)                      | root, hypocotyl, leaf                          |
| <i>BvEXPA10L-1</i> | 1.020 (0.131)                      | 0.520 (0.282)                           | 1.285 (0.856)                      | root, hypocotyl, leaf                          |
| <i>BvEXPA10L-2</i> | 1.418 (0.818)                      | 1.000 (0.297)                           | 0.493(0.151)                       | root, hypocotyl, leaf                          |
| <i>BvEXPA11L-1</i> | 1.190 (0.531)                      | 1.308 (0.399)                           | 0.053 (0.037)                      | root, hypocotyl                                |
| <i>BvEXPA11L-2</i> | 1.173 (0.182)                      | 0.125 (0.021)                           | 0.008 (0.008)                      | root                                           |
| <i>BvEXPA12</i>    | 0.873 (0.113)                      | 6.235(2.378)                            | 20.527 (4.909)                     | hypocotyl, leaf                                |
| <i>BvEXPA13</i>    | 0.943 (0.334)                      | 1.125(0.684)                            | 0.470 (0.170)                      | root, hypocotyl, leaf                          |
| <i>BvEXPA16</i>    | 0.703 (0.249)                      | 1.050 (0.425)                           | 0.757 (0.551)                      | root, hypocotyl, leaf                          |
| <i>BvEXPA23L-1</i> | NT                                 | NT                                      | NT                                 |                                                |
| <i>BvEXPA23L-2</i> | NT                                 | NT                                      | NT                                 |                                                |
| <i>BvEXPA25L</i>   | NT                                 | NT                                      | NT                                 |                                                |
| <i>BvEXPA26</i>    | NT                                 | NT                                      | NT                                 |                                                |
| <i>BvEXPA32L</i>   | 0.864 (0.206)                      | 15.755 (1.067)                          | 0.006 (0.003)                      | hypocotyl                                      |
| <i>BvEXPB3</i>     | 0.905 (0.220)                      | 4.880 (2.481)                           | 3.797 (3.747)                      | hypocotyl, leaf                                |
| <i>BvEXPB15L</i>   | 1.042 (0.312)                      | 10.495 (0.700)                          | 0.060 (0.018)                      | hypocotyl                                      |
| <i>BvEXLA1a</i>    | 1.310 (0.782)                      | 0.708 (0.170)                           | 0.179 (0.140)                      | root, hypocotyl                                |
| <i>BvEXLA1b</i>    | 0.820 (0.223)                      | 0.522 (0.380)                           | 1.27 (0.354)                       | root, hypocotyl, leaf                          |
| <i>BvEXLA2a</i>    | 0.633 (0.320)                      | 0.450 (0.223)                           | 0.091 (0.089)                      | root, hypocotyl                                |
| <i>BvEXLA2b</i>    | 1.027 (0.566)                      | 0.197 (0.173)                           | 0.080 (0.035)                      | root                                           |
| <i>BvEXLA3a</i>    | 0.760 (0.422)                      | 0.338 (0.147)                           | 0.030 (0.008)                      | root, hypocotyl                                |
| <i>BvEXLA3b</i>    | 1.063 (0.637)                      | 8.320 (0.453)                           | 0.292 (0.153)                      | hypocotyl                                      |
| <i>BvEXLA3c</i>    | 1.333 (1.115)                      | 0.560 (0.057)                           | 0.131 (0.130)                      | root, hypocotyl                                |
| <i>BvEXLB1a</i>    | 1.070 (0.268)                      | 0.870 (0.082)                           | 0.196 (0.132)                      | root, hypocotyl                                |
| <i>BvEXLB1b</i>    | 0.890 (0.448)                      | 0.049 (0.042)                           | 0.116 (0.078)                      | root                                           |
| <i>BvEXLB1c</i>    | 0.985 (0.515)                      | 0.035(0.030)                            | 0.009 (0.002)                      | root                                           |
