# Supplementary material
Source: PubMed Central journal article supplement (PMC6638176)
Supplement: MPP-19-2333-s008.pdf [file MPP-19-2333-s008.pdf]

**Table S3** BNYVV-dependent changes (by natural soil-mediated infection with BNYVV) in *EXPANSIN* gene expression 4 and 6 weeks post sowing (wps) assayed by RT-qPCR. The expression was normalized with *BvICDH* gene encoding isocitrate dehydrogenase and gene expression in mock (non-infested soil) was set to 1. G, S, H, BNYVV-infested soils from Germany, Sweden and Holland (The Netherlands), respectively. NT, not tested. Data are n≥4. s.d., in parenthesis.

| Gene               | Normalized fold expression (s.d.)<br>4 wps |               |               | Normalized fold expression (s.d.)<br>6 wps |              |              |
|--------------------|--------------------------------------------|---------------|---------------|--------------------------------------------|--------------|--------------|
|                    | G                                          | S             | H             | G                                          | S            | H            |
| <i>BvEXPA2L</i>    | 1.02 (0.30)                                | 2.00 (1.41)   | 1.85 (0.13)   | 0.14 (0.02)                                | 1.15 (0.65)  | 0.37 (0.11)  |
| <i>BvEXPA4a</i>    | 0.11 (0.08)                                | 1.00 (0.14)   | 0.76 (0.32)   | NT                                         | NT           | NT           |
| <i>BvEXPA4b</i>    | 0.11 (0.03)                                | 0.77 (0.13)   | 0.87 (0.49)   | NT                                         | NT           | NT           |
| <i>BvEXPA4c</i>    | 0.23 (0.04)                                | 0.54 (0.21)   | 0.74 (0.41)   | NT                                         | NT           | NT           |
| <i>BvEXPA4L</i>    | 1.74 (0.27)                                | 8.24 (3.70)   | 6.81 (4.77)   | 1.92 (1.83)                                | 4.29 (1.90)  | 5.23 (3.02)  |
| <i>BvEXPA7</i>     | 11.07 (4.86)                               | 26.49 (10.16) | 43.41 (21.05) | 0.45 (0.18)                                | 3.65 (0.47)  | 2.1 (0.61)   |
| <i>BvEXPA7L</i>    | 7.29 (3.68)                                | 12.18 (12.05) | 23.76 (10.51) | 0.50 (0.37)                                | 0.60 (0.25)  | 0.69 (0.47)  |
| <i>BvEXPA10</i>    | 0.26 (0.10)                                | 0.71 (0.57)   | 0.80 (0.34)   | 0.12 (0.06)                                | 0.24 (0.08)  | 0.33 (0.26)  |
| <i>BvEXPA10L-1</i> | 0.6 (0.33)                                 | 1.67 (0.77)   | 1.72 (0.88)   | 0.03 (0.02)                                | 0.08 (0.06)  | 0.11 (0.04)  |
| <i>BvEXPA10L-2</i> | 0.18 (0.11)                                | 0.41 (0.07)   | 0.80 (0.31)   | NT                                         | NT           | NT           |
| <i>BvEXPA11L-1</i> | 3.05 (2.61)                                | 34.84 (12.38) | 34.21 (13.67) | 2.38 (2.50)                                | 6.61 (1.38)  | 1.92 (0.51)  |
| <i>BvEXPA11L-2</i> | 0.16 (0.05)                                | 0.69 (0.17)   | 0.86 (0.23)   | 0.42 (0.28)                                | 1.18 (0.58)  | 0.75 (0.36)  |
| <i>BvEXPA12</i>    | 2.38 (0.36)                                | 3.65 (1.32)   | 1.92 (0.40)   | 3.97 (4.20)                                | 10.10 (6.98) | 13.50 (9.25) |
| <i>BvEXPA13</i>    | 3.75 (3.98)                                | 5.32 (2.75)   | 5.30 (3.50)   | 0.23 (0.13)                                | 0.71 (0.21)  | 0.51 (0.07)  |
| <i>BvEXPA16</i>    | 0.29 (0.16)                                | 2.01 (1.08)   | 1.81 (1.74)   | 0.29 (0.12)                                | 1.67 (0.45)  | 0.89 (0.12)  |
| <i>BvEXPA23L-1</i> | NT                                         | NT            | NT            | NT                                         | NT           | NT           |
| <i>BvEXPA23L-2</i> | NT                                         | NT            | NT            | NT                                         | NT           | NT           |
| <i>BvEXPA25L</i>   | NT                                         | NT            | NT            | NT                                         | NT           | NT           |
| <i>BvEXPA26</i>    | NT                                         | NT            | NT            | NT                                         | NT           | NT           |
| <i>BvEXPA32L</i>   | 0.79 (0.16)                                | 2.80 (1.42)   | 1.05 (0.43)   | 0.34 (0.11)                                | 0.71 (0.07)  | 0.64 (0.54)  |
| <i>BvEXPB3</i>     | 0.17 (0.08)                                | 1.59 (0.67)   | 0.87 (0.55)   | NT                                         | NT           | NT           |
| <i>BvEXPB15L</i>   | NT                                         | NT            | NT            | NT                                         | NT           | NT           |
| <i>BvEXLA1a</i>    | 2.44 (1.33)                                | 5.65 (2.50)   | 9.39 (4.22)   | 2.12 (0.91)                                | 7.61 (3.85)  | 9.11 (4.58)  |
| <i>BvEXLA1b</i>    | 2.16 (0.43)                                | 4.36 (2.45)   | 2.43 (0.21)   | 1.14 (0.44)                                | 2.77 (1.00)  | 2.23 (0.39)  |
| <i>BvEXLA2a</i>    | 5.63 (1.65)                                | 1.42 (0.45)   | 1.38 (0.83)   | 2.62 (1.05)                                | 0.49 (0.41)  | 0.64 (0.33)  |
| <i>BvEXLA2b</i>    | 1.16 (0.42)                                | 0.70 (0.21)   | 1.01 (0.22)   | 1.16 (0.71)                                | 1.87 (2.17)  | 3.27 (1.43)  |
| <i>BvEXLA3a</i>    | 16.64 (15.26)                              | 28.90 (28.11) | 29.14 (40.88) | 2.76 (1.71)                                | 5.58 (2.74)  | 4.38 (2.05)  |
| <i>BvEXLA3b</i>    | NT                                         | NT            | NT            | NT                                         | NT           | NT           |
| <i>BvEXLA3c</i>    | 0.02 (0.01)                                | 0.06 (0.08)   | 0.08 (0.05)   | NT                                         | NT           | NT           |
| <i>BvEXLB1a</i>    | 5.60 (0.88)                                | 0.90 (0.44)   | 2.88 (1.12)   | 1.50 (0.92)                                | 0.72 (0.88)  | 0.24 (0.13)  |
| <i>BvEXLB1b</i>    | 55.49 (58.70)                              | 0.69 (0.69)   | 40.74 (41.77) | 2.18 (1.28)                                | 2.02 (0.46)  | 0.47 (0.23)  |
| <i>BvEXLB1c</i>    | 17.64 (19.00)                              | 3.17 (0.18)   | 14.84 (8.07)  | 2.00 (1.61)                                | 2.23 (1.54)  | 1.15 (0.43)  |
