# Supplementary material
Source: PubMed Central journal article supplement (PMC6638176)
Supplement: MPP-19-2333-s009.pdf [file MPP-19-2333-s009.pdf]

**Table S4** *B. vulgaris* orthologues of *Arabidopsis* genes involved in lateral root development used in our analysis.

| <b>B. vulgaris gene</b>               | <b>Accession number</b> | <b>Orthologous in <i>Arabidopsis</i></b> | <b><i>Arabidopsis</i> locus name</b> |
|---------------------------------------|-------------------------|------------------------------------------|--------------------------------------|
| <i>BvLBD16</i>                        | XM_010680914            | <i>AtLBD16</i>                           | AT2G42430                            |
| <i>BvLBD18</i>                        | XM_010693967            | <i>AtLBD18</i>                           | AT2G45420                            |
| <i>BvLBD29</i>                        | XM_010680915            | <i>AtLBD29</i>                           | AT3G58190                            |
| <i>BvARF7</i> (transcript variant X1) | XM_010689234            | <i>AtARF7</i>                            | AT5G20730                            |
| <i>BvARF7</i> (transcript variant X2) | XM_010689235            | <i>AtARF7</i>                            | AT5G20730                            |
| <i>BvARF19</i>                        | XM_010671296            | <i>AtARF19</i>                           | AT1G19220                            |
| <i>BvIAA14</i>                        | XM_010680863            | <i>AtIAA14</i>                           | AT4G14550                            |
| <i>BvAUX28</i>                        | XM_010676553            | <i>AtIAA28</i>                           | AT5G25890                            |
