# Supplementary material
Source: PubMed Central journal article supplement (PMC6638176)
Supplement: MPP-19-2333-s010.pdf [file MPP-19-2333-s010.pdf]

**Table S5** Sequences of all oligonucleotides used in this study. \*, sequences of the primers published in [Ref. 1,2].

| Name                 | Sequence (5'-3')                                           | Used for                            |
|----------------------|------------------------------------------------------------|-------------------------------------|
| BNYVV2(1)for*        | ACATTTCTATCCTCCTCCAC                                       | BNYVV detection by RT-PCR           |
| BNYVV2(1)rev*        | ACCCCAACAAACTCTCTAAC                                       | BNYVV detection by RT-PCR           |
| PB4for*              | CAAACGCCTGAAATCATCTAAC                                     | <i>P. betae</i> detection by RT-PCR |
| PB4rev*              | GATGGCCCAATTCCTTACAC                                       | <i>P. betae</i> detection by RT-PCR |
| BNYVV P25 Fw         | GGGACAAGTTTGTACAAAAAAGCAGGCTT<br>GACCATGGGTGATATATTAGGCGCA | Gateway cloning of P25 ORF          |
| BNYVV P25 Rv         | GGGACCACTTTGTACAAGAAAGCTGGGTA<br>CTAATCATCATCAACACCGTC     | Gateway cloning of P25 ORF          |
| BvICDH-SELA3724F*    | CACACCAGATGAAGGCCGT                                        | RT-qPCR                             |
| BvICDH-SELA3725R*    | CCCTGAAGACCGTGCCAT                                         | RT-qPCR                             |
| Bv EXPA2-like-(10)-F | AGAACCTTGTTTCTTAAAAATTGCC                                  | RT-qPCR                             |
| Bv EXPA2-like-(10)-R | TGTGAATCTTATGCCTCCTGTTTT                                   | RT-qPCR                             |
| BvExpA4a(09)qPCR(6)F | ATTCGGTGACTACGGTGGTG                                       | RT-qPCR                             |

|                           |                          |         |
|---------------------------|--------------------------|---------|
| BvExpA4a(09)qPCR(6)R      | GTTTCCGTACCCACATGCTC     | RT-qPCR |
| BvExpA4b(47)qPCR(3)F      | CTTTCCGCAGGGTGCCAT       | RT-qPCR |
| BvExpA4b(47)qPCR(3)R      | GCACCCGCAACATTAATAACC    | RT-qPCR |
| BvExpA4c(65)qPCR(3)F      | CGCTTCTGGAAGTATGGGAGG    | RT-qPCR |
| BvExpA4c(65)qPCR(3)R      | CTGTGCTAAGTGCAGCCGTA     | RT-qPCR |
| BvExpA4-likeqPCR(7)F      | CTACCGCCGGGTTCCAT        | RT-qPCR |
| BvExpA4-likeqPCR(7)R      | AGCCCCAGCAACATTAGTTAT    | RT-qPCR |
| BvExp7qPCR(4)-F           | ACCTCTCCATGCCTGCATTT     | RT-qPCR |
| BvExp7qPCR(4)-R           | CTTCGCACATGGAACCTCC      | RT-qPCR |
| BvExpA7-like-qPCR(6)-F    | ACTATGGGAGGAGCTTGTGG     | RT-qPCR |
| BvExpA7-like-qPCR(6)-R    | AGCTAAGAGCTGCCGTTTCT     | RT-qPCR |
| Bv EXPA10 (2)-F           | CCCTCCTCTTCAACACTTCGATT  | RT-qPCR |
| Bv EXPA10 (2)-R           | AAGGTACCCTTCTAAAGGAAACAG | RT-qPCR |
| BvExpA10L-1(150)qPCR(9)-F | GTTGCGTACCGAAGAGTACC     | RT-qPCR |
| BvExpA10L-1(150)qPCR(9)-R | CGGCGACATTAGTGATTAACCC   | RT-qPCR |
| BvExpA10L-2-qPCR(7)F      | TCCTTTAGAAGGGTACCATGCAG  | RT-qPCR |
| BvExpA10L-2-qPCR(7)R      | CACCTCCGACGTTGGTGATTA    | RT-qPCR |
| BvExpA11L-1(17)qPCR(7)-F  | GCGCGCTTACAGTACAGTTT     | RT-qPCR |
| BvExpA11L-1(17)qPCR(7)-R  | ATTTCCGGCGGCTTAAACCCA    | RT-qPCR |
| BvExpA11L-2(44)qPCR(2)-F  | GTTCAAGCCTTTGTGGCTTCT    | RT-qPCR |
| BvExpA11L-2(44)qPCR(2)-R  | TACCCACAAGCTCCTCCATA     | RT-qPCR |
| BvExpA12-qPCR(4)-F        | TATCATGCCATAGGCGAGGC     | RT-qPCR |
| BvExpA12-qPCR(4)-R        | TCACATCTCCACTACCCCA      | RT-qPCR |
| BvExpA13-qPCR(1)-F        | GCTGTCCAATACCGAAGGATCA   | RT-qPCR |
| BvExpA13-qPCR(1)-R        | ACTGACAAGCACGGACACAA     | RT-qPCR |
| BvExpA16qPCR(3)F          | TTCCCTCGCCAGCATTTCG      | RT-qPCR |
| BvExpA16qPCR(3)R          | CACACTCTACCCTCCTGTATTGA  | RT-qPCR |
| Bv EXPA32-like (5) F      | GAGGTGCAGGAGATGTCGAA     | RT-qPCR |
| Bv EXPA32-like (5) R      | GCTCTCCCAGTATTGACCCC     | RT-qPCR |
| BvExpB3qPCR(3)F           | AAGAGAGGCGACATCCAATGA    | RT-qPCR |
| BvExpB3qPCR(3)R           | GGTCCCCCAATTATGCACCA     | RT-qPCR |
| Bv EXPB15L(6)-F           | TCCGGGATCGAACCAATACT     | RT-qPCR |
| Bv EXPB15L(6)-R           | CCACCCACCAGATCTTTGCT     | RT-qPCR |
| BvExp-like A1a-qPCR-F     | TGGCCTTACCTGCCAAAGAT     | RT-qPCR |
| BvExp-like A1a-qPCR-R     | AAACACAGGGCACCCCTCTTA    | RT-qPCR |

|                           |                               |                                                                                                |
|---------------------------|-------------------------------|------------------------------------------------------------------------------------------------|
| Bv EXPLA1b-72 (4)-For     | AGGAGGTGATGTGGCTTCG           | RT-qPCR                                                                                        |
| Bv EXPLA1b-72 (4)-Rev     | GGTTGGGGCATTGTTTGTGTC         | RT-qPCR                                                                                        |
| BvExp-likeA2a qPCR(1)F    | TAGCCGTGCTTTTAAGGCGA          | RT-qPCR                                                                                        |
| BvExp-likeA2a qPCR(1)R    | AATCGCAAGCGACCCTCTTA          | RT-qPCR                                                                                        |
| Bv EXPLA2b (3)-F          | TGGATGTTGCTCAGGTTGGT          | RT-qPCR                                                                                        |
| Bv EXPLA2b (3)-R          | TGCAATGGCCCACTTGGTA           | RT-qPCR                                                                                        |
| BvExp-likeA3a qPCR(10)F   | GGTTGAAGTAGCCTCGGTTGATA       | RT-qPCR                                                                                        |
| BvExp-likeA3a qPCR(10)R   | CTTTGTTCGTGTCCCACACAG         | RT-qPCR                                                                                        |
| Bv EXLA3b new (1)-F       | GAGCTATAGCCAAAGGCCCA          | RT-qPCR                                                                                        |
| Bv EXLA3b new (1)-R       | CACCCACCGTGGCTATATCA          | RT-qPCR                                                                                        |
| Bv EXPLA3c (2)-F          | GAAGAGGCCAGCAACAAACC          | RT-qPCR                                                                                        |
| Bv EXPLA3c (2)-R          | TTGAGCCCACCATAGCTACA          | RT-qPCR                                                                                        |
| BvExp-likeB1a(35)qPCR(2)F | TGCATGTTACAAGTTAGGTGC         | RT-qPCR                                                                                        |
| BvExp-likeB1a(35)qPCR(2)R | GGACACGCCATAGTCCGTAA          | RT-qPCR                                                                                        |
| BvExp-likeB1b qPCR(1)F    | TTGGCAGGAAGACTGCAAAG          | RT-qPCR                                                                                        |
| BvExp-likeB1b qPCR(1)R    | GGTCAGCCCTTGGTGGATTT          | RT-qPCR                                                                                        |
| BvExp-LB1c(87)qPCR(2)-F   | AGGACATCACTGCTGTGCAA          | RT-qPCR                                                                                        |
| BvExp-LB1c(87)qPCR(2)-R   | ACTTGTCCACACAGCACCAT          | RT-qPCR                                                                                        |
| BvLBD16-qPCR(5)-F         | TTGCAGCAACAGGTGGCATA          | RT-qPCR                                                                                        |
| BvLBD16-qPCR(5)-R         | TGTTGTTGTTGTTGTCCATTGAT       | RT-qPCR                                                                                        |
| BvLBD18qPCR(10)F          | GCTCTGGAGGGGGTGATCTA          | RT-qPCR                                                                                        |
| BvLBD18qPCR(10)R          | GGATCATGCATGTGCCAAT           | RT-qPCR                                                                                        |
| BvLBD29-qPCR-F            | GAGGCTCAAGCTAGGCTCCA          | RT-qPCR                                                                                        |
| BvLBD29-qPCR-R            | TTGTGCTTGTAAGTTAACAACCTGT     | RT-qPCR                                                                                        |
| Bv ARF7-like qPCR(6)-F    | TGACCCTGCTGTTTTGGGTG          | RT-qPCR                                                                                        |
| Bv ARF7-like qPCR(6)-R    | ATCTACCAACTGAGCCACGC          | RT-qPCR                                                                                        |
| Bv ARF19-like qPCR(7)F    | GGATGACCCTTGGGAGGACT          | RT-qPCR                                                                                        |
| Bv ARF19-like qPCR(7)R    | TCCCGAAATCACCATCAAGGC         | RT-qPCR                                                                                        |
| Bv IAA14-like qPCR(2)-F   | GAAAGGAGGCTGCTGGTCTT          | RT-qPCR                                                                                        |
| Bv IAA14-like qPCR(2)-R   | TCAAAGGAGCAGGATTGTTCCA        | RT-qPCR                                                                                        |
| Bv AUX28 qPCR5-F          | GATGCTCGTTGGCGATGTTT          | RT-qPCR                                                                                        |
| Bv AUX28 qPCR5-R          | TTGGTGCTAGTCCAATGGCTT         | RT-qPCR                                                                                        |
| 1-up-EcoRI                | ATGAATTCAGCAGCAGGATTAATTTCTGA | Cloning BvAUX28 Domain I, Domain I+II, Domain I-IV and Domain I+III+IV for Y2H; forward primer |

|                  |                                      |                                                                            |
|------------------|--------------------------------------|----------------------------------------------------------------------------|
| 99-low-XhoI      | TACTCGAGTCACA <u>ACTGATCCGGTTGTT</u> | Cloning BvAUX28 Domain I; reverse primer                                   |
| 100-up-EcoRI     | AGAATTCGTGAAGAAACAACAACGGC           | Cloning BvAUX28 Domain II and Domain II-IV; forward primer                 |
| 501-low-XhoI     | TACTCGAGTCATGCACTTGCGATAGTGTT        | Cloning BvAUX28 Domain II, Domain I+II; reverse primer                     |
| 502-up-EcoRI     | AGAATTCGCATTTGTTAAGGTTAGCAT          | Cloning BvAUX28 Domain III+IV; forward primer                              |
| 858-low-XhoI     | TATCTCGAGTCAGCTTCTACTCTTGCATT        | Cloning BvAUX28 Domain I-IV, Domain I+III+IV, Domain II-IV; reverse primer |
| 1-99+502-858-up  | ATCAGCTAGCGCATTGTTAAGGTTAGC          | Cloning BvAUX28 Domain I+III+IV; forward primer                            |
| 1-99+502-858-low | ATCAGCTAGCCAACTGATCCGGTTGTTCC        | Cloning BvAUX28 Domain I+III+IV; reverse primer                            |
| Bv-Aux/IAA-BamHI | TAGGATCCAGCAGCACGATTAATTTCGA         | Cloning BvAUX28 to obtain a construct for GST-pulldown                     |
| Bv-Aux/IAA-EcoRI | ATGAATTCTCAGCTTCTACTCTTGCATTTCT      | Cloning BvAUX28 to obtain a construct for GST-pulldown                     |
| P25- BglII       | TATAGATCTGTGCATGGGTGATATATTAGGCG     | Engineering P25 constructs for sub-cellular localization                   |
| P25-XhoI         | AATCTCGAGATCATCATCATCAACACCGT        | Engineering P25 constructs for sub-cellular localization                   |
| P25-BglII        | GTATAGATCTGGTGATATATTAGGCGCAGT       | Engineering P25 constructs for BiFC                                        |
| P25-Sall         | TATGTCGACATCATCATCATCAACACCGT        | Engineering P25 constructs for BiFC                                        |
| 1-up-BamHI       | TGGGATCCAGCAGCACGATTAATTTCGA         | Engineering BvAUX28 constructs for BiFC                                    |
| 501-low-Sall     | ATAGTCGACTGCACTTGCGATAGTGTT          | Engineering BvAUX28 constructs for BiFC                                    |
| 1-up-BamHI       | TGGGATCCAGCAGCACGATTAATTTCGA         | Engineering BvAUX28 constructs for BiFC                                    |
| 858-low-Sall     | TATGTCGACGCTTCTACTCTTGCATTTCT        | Engineering BvAUX28 constructs for BiFC                                    |

## SUPPORTING INFORMATION REFERENCE

1. Meunier, A., Schmit, J. J.-F. F., Stas, A., Kutluk, N. & Bragard, C. Multiplex Reverse Transcription-PCR for Simultaneous Detection of Beet Necrotic Yellow Vein Virus , Beet Soilborne Virus , and Beet Virus Q and Their Vector *Polymyxa betae* KESKIN on Sugar Beet Multiplex Reverse Transcription-PCR for Simultaneous Detection. *Appl. Environ. Microbiol.* **69**, 2356–2360 (2003).
2. Pin, P. A. *et al.* An antagonistic pair of FT homologs mediates the control of flowering time in sugar beet. *Science* . **330**, 1397–400 (2010).
